# Supplementary material for: Leptin Receptors in RIP-Cre25Mgn Neurons Mediate Anti-dyslipidemia Effects of Leptin in Insulin-Deficient Mice
Source: Front Endocrinol (Lausanne). 2020 Sep 23;11:588447. doi: 10.3389/fendo.2020.588447 (PMC7538546; doi:10.3389/fendo.2020.588447)
Supplement: Supplementary file 1 [file Table_1.XLSX]

## Sheet: Sheet1
Genotype	Primers	Annealing Temperature	Expected Band Size (bp)
RIP-Cre25Mgn	GGTCAGCCTAATTAGCTCTGT	62	Internal Control	600
	GATCTCCAGCTCCTCCTCTGTC		tg	200
	GCCCTGGAAGGGATTTTTGAAGCA
	ATGGCTAATCGCCATCTTCCAGCA
Lepr TB	CAGTCTGGACCGAAGGTGTT	60	wt	500
	TAGGGCCAAACCCACATTTA		TB	260
	CCCAAGGCCATACAAGTGTT		∆	550
Lepr flox	TGAACAGGCTTGAGAACATGAACAC	60	wt	200
	AGAATGAAAAAGTTGTTTTGGGACGAT		flox	250
Lepr ∆ for flox	TGAACAGGCTTGAGAACATGAACAC	60	∆	250
	GGTGTCTGATTTGATAGATGGTCTT		wt	648
Gcg TB	CCTTCAGAAAAGCTGTCAGA		wt	180
	TCCTATGTAACTGTTTGGCATG		TB	315
	GCATTCTAGTTGTGGTTTGTCC
RIPHerr-DTR tg allele	ACGGCTGCTTCATCTACAAGG	62	tg	230
	TTGGTGTCCACGTAGTAGTAG		Internal Control	450
	CCCTCCTCACCTTTCCCTTA
	CTGTCCTCAGAAAGCCTTGG
RIPHerr-DTR wild-type allele	CTCCGGAAAGCAGTGAGGTAAG	62	wt	304
	GAGGGAGAAAAATGCGGA		Internal Control	600
	GGTCAGCCTAATTAGCTCTGT
	GATCTCCAGCTCCTCCTCTGTC
tdTomato TB (Ai9)	AAGGGAGCTGCAGTGGAGTA	60	wt	297
	CCGAAAATCTGTGGGAAGTC		TB	197
	GGCATTAAAGCAGCGTATCC
	CTGTTCCTGTACGGCATGG
